# Supplementary material for: T cell interaction with activated endothelial cells primes for tissue-residency
Source: PubMed Central journal article supplement (PMC9510578; doi:10.3389/fimmu.2022.827786), 2022-09-12
Supplement: DataSheet_1.pdf [file DataSheet_1.pdf]

## SUPPLEMENTARY MATERIAL

**Supplementary table 1. Blocking antibodies used in the co-culture experiments.**

| Antigen                 | Company      | Clone      |
|-------------------------|--------------|------------|
| IL-15                   | eBioscience™ | ct2nu      |
| TGF-β                   | Biologend    | 19D8       |
| VCAM-1                  | R&D systems  | BBIG-V1    |
| ICAM-1                  | Biologend    | HCD54      |
| IgG1 κ Isotype control  | eBioscience™ | P3.6.2.8.1 |
| HLA-ABC                 | Bioceros BV  | W6/32      |
| IgG2a κ Isotype control | eBioscience™ | eBM2a      |

**Supplementary table 2. Antibodies used for flow cytometry.**

| Antigen | Fluorescent label | Dilution | Company            | Clone   |
|---------|-------------------|----------|--------------------|---------|
| CCR7    | APC               | 50x      | Sony Biotechnology | G043H7  |
| CD3     | FITC              | 50×      | Sony Biotechnology | OKT3    |
| CD3     | eF450             | 200×     | eBioscience™       | OKT3    |
| CD3     | PE                | 50x      | BD Bioscience      | SK7     |
| CD3     | V500              | 50x      | BD Bioscience      | SP34-2  |
| CD4     | PerCP Cy5.5       | 400×     | Sony Biotechnology | RPA-T4  |
| CD8     | APC               | 1600×    | BD Bioscience      | SK1     |
| CD8     | APC-Cy7           | 50×      | BD Bioscience      | SK1     |
| CD11c   | V450              | 200x     | BD Bioscience      | B-LY6   |
| CD14    | APC-Cy7           | 100x     | BD Bioscience      | MphiP9  |
| CD25    | PE-Cy7            | 25×      | BD Bioscience      | M-A251  |
| CD27    | PerCP             | 200x     | Biologend          | O323    |
| CD38    | PE-Cy7            | 50×      | eBioscience™       | HIT2    |
| CD40    | FITC              | 50x      | eBioscience™       | 5C3     |
| CD45RO  | PB                | 50×      | Sony Biotechnology | UCHL1   |
| CD45RA  | PB                | 200x     | Biologend          | HI100   |
| CD45RA  | FITC              | 50×      | BD Bioscience      | HI100   |
| CD45RA  | APC-Cy7           | 400×     | Sony Biotechnology | HI100   |
| CD49a   | AF647             | 1600×    | Sony Biotechnology | ts2/7   |
| CD57    | FITC              | 100×     | Biologend          | HNK-1   |
| CD62L   | APC-Cy7           | 50×      | Biologend          | DREG-56 |
| CD69    | PE                | 25×      | Miltenyi           | FN50    |
| CD69    | PE-Cy7            | 50×      | BD Bioscience      | FN50    |
| CD80    | APC-H7            | 50x      | BD Bioscience      | L307.4  |
| CD86    | PB                | 50x      | Biologend          | IT2.2   |

|                                |              |       |                    |            |
|--------------------------------|--------------|-------|--------------------|------------|
| <b>CD103</b>                   | FITC         | 25×   | Beckman Coulter    | 2G5        |
| <b>CTLA-4</b>                  | APC          | 12,5× | BD Bioscience      | BN13       |
| <b>CXCR6</b>                   | PE           | 50×   | R&D systems        | 56811      |
| <b>CX3CR1</b>                  | FITC         | 50×   | Biolegend          | 2A9-1      |
| <b>Granzyme B</b>              | FITC         | 50×   | BD Bioscience      | GB11       |
| <b>HLA-ABC</b>                 | APC-Cy7      | 100x  | Sony Biotechnology | W6/32      |
| <b>HLA-DR</b>                  | PerCP-Cy5.5  | 200x  | Biolegend          | L243       |
| <b>HLA-DR</b>                  | PE-Cy7       | 400x  | Biolegend          | L243       |
| <b>HLA-DR</b>                  | Pacific Blue | 200x  | Sony Biotechnology | L243       |
| <b>ICAM-1</b>                  | APC          | 100x  | BD Bioscience      | HA58       |
| <b>ICOS</b>                    | APC          | 20×   | eBioscience™       | ISA3       |
| <b>IFN-<math>\gamma</math></b> | FITC         | 50×   | BD Bioscience      | 25723.11   |
| <b>IL-2</b>                    | FITC         | 100×  | BD Bioscience      | MQ1-17H12  |
| <b>IL-17a</b>                  | PE           | 100×  | eBioscience™       | eBio64DEC1 |
| <b>Ki67</b>                    | FITC         | 100×  | BD Bioscience      | B56        |
| <b>PD-1</b>                    | PE           | 25×   | BD Bioscience      | EH12.1     |
| <b>S1PR1</b>                   | eF660        | 200×  | eBioscience™       | SW4GYPP    |
| <b>T-Bet</b>                   | PE           | 50×   | eBioscience™       | eBio4B10   |
| <b>TNF-<math>\alpha</math></b> | APC          | 400×  | Biolegend          | Mab11      |
| <b>VCAM-1</b>                  | PE           | 100x  | eBioscience™       | STA        |

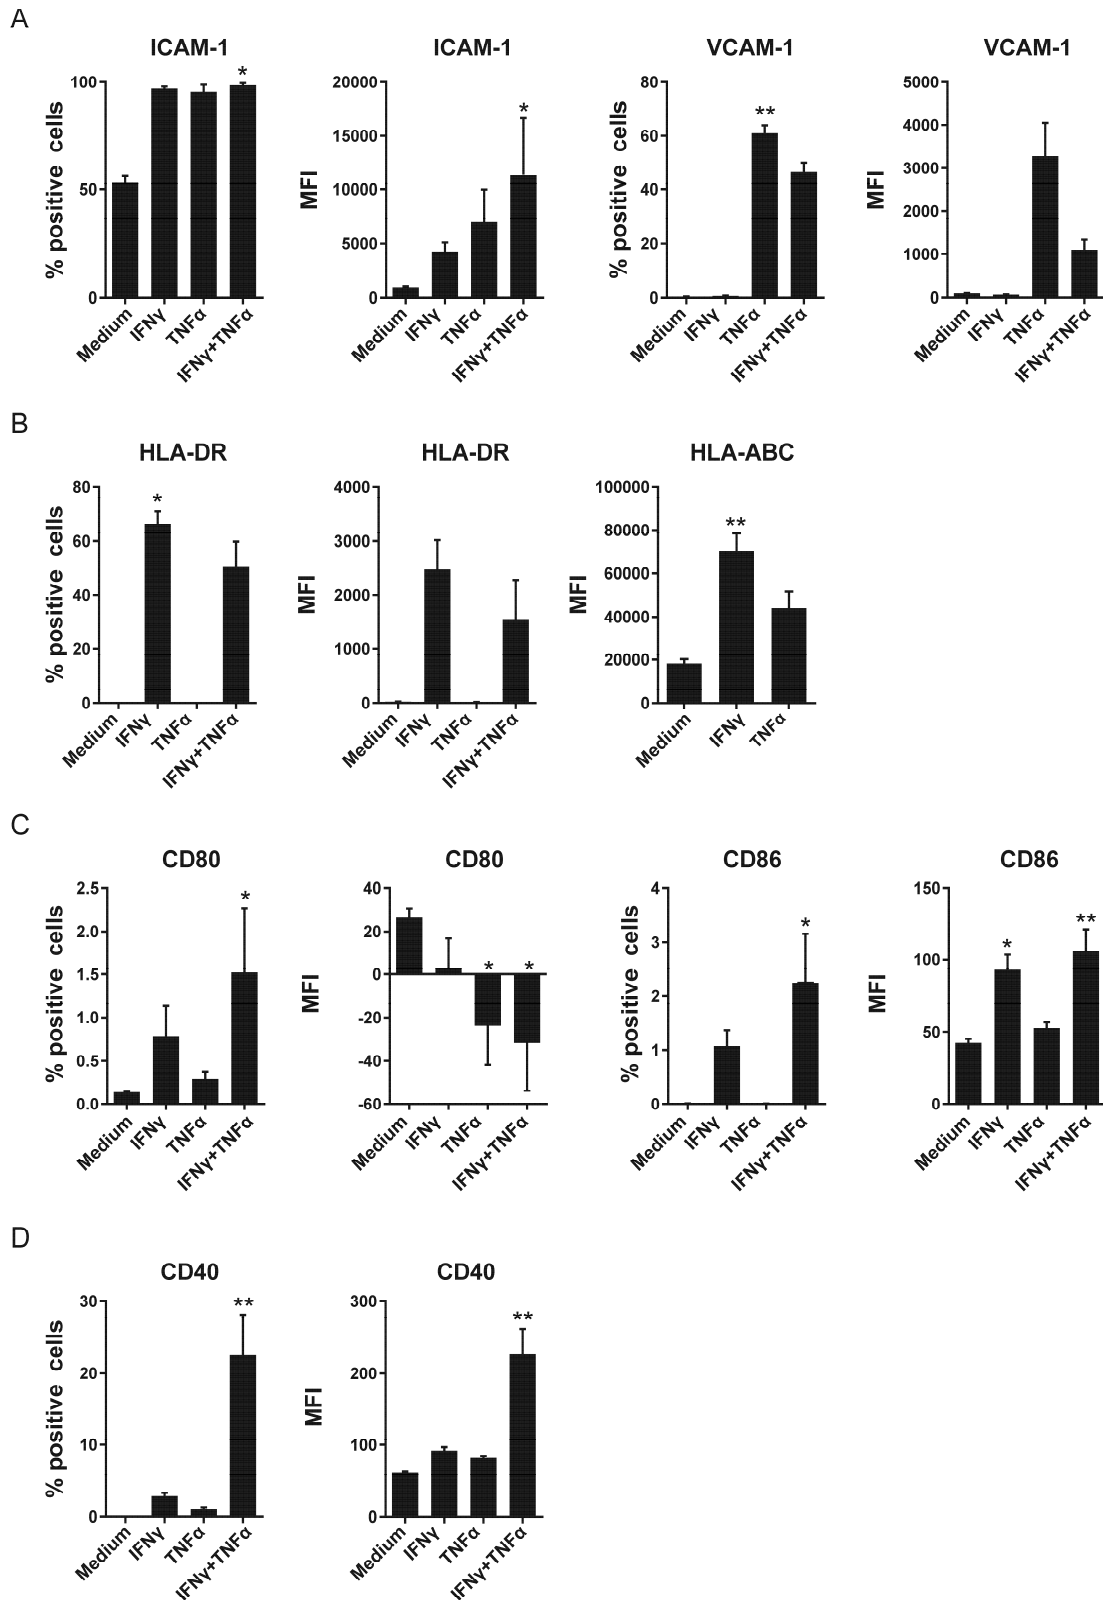

**Supplementary figure 1. Expression of adhesion molecules, MHC molecules and costimulatory molecules on EC in response to stimulation with TNF $\alpha$  and/or IFN $\gamma$ .** HMEC were incubated with 10 ng/mL TNF $\alpha$  and/or IFN $\gamma$  for 3 days. Expression of (A) adhesion, (B) MHC, and (C+D) costimulatory molecules was analyzed by flow cytometry.  $N=4$ ; mean+SEM. Kruskal-Wallis with Dunn's post-hoc test. \* $P<0.05$ , \*\* $P<0.01$ .

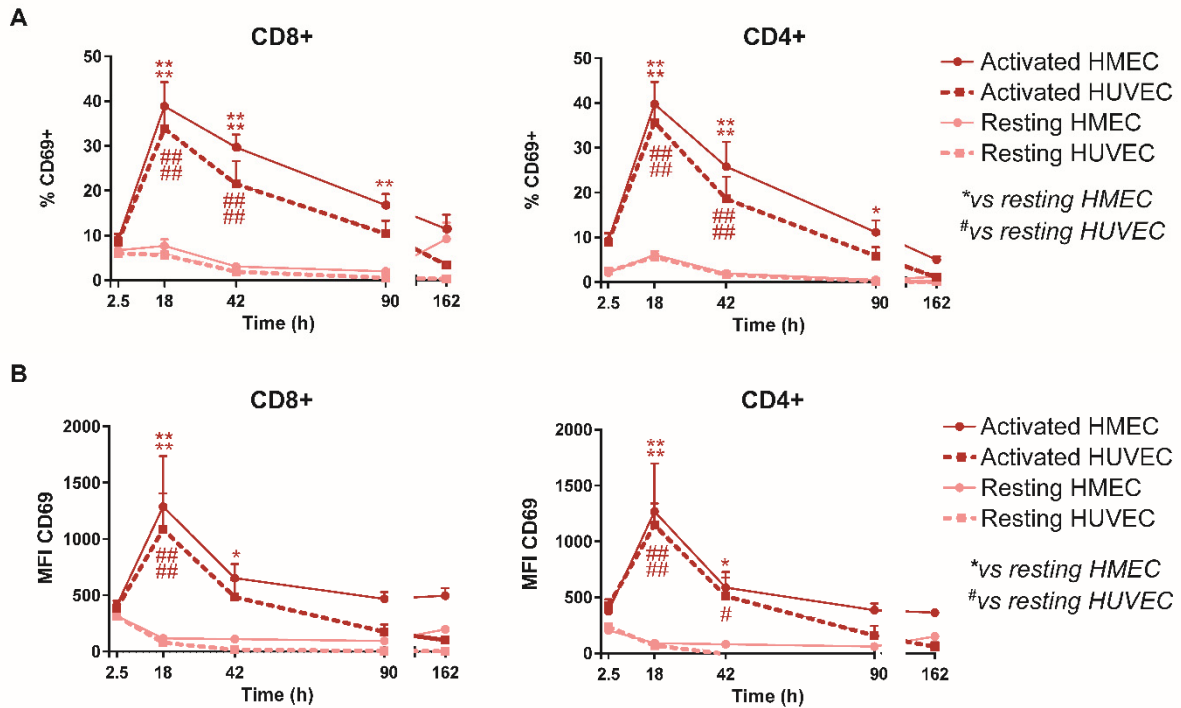

**Supplementary figure 2. Dynamic of CD69 induction on T cells by HMEC and HUVEC.** HMEC and HUVEC were left unstimulated (resting) or stimulated with 10 ng/mL TNF $\alpha$  and IFN $\gamma$  for 3 days before addition of FACS-sorted CD3 $^+$  T cells to the co-culture. CD69 expression on CD8 $^+$  and CD4 $^+$  T cells was analyzed by flow cytometry at different time points. **(A)** Percentage of CD69 $^+$  cells among T cells. **(B)** Median fluorescent intensity (MFI) of CD69 expression on T cells.  $N=4$ , mean+SEM. 2-Way-ANOVA with Sidak post-hoc test versus isotype. \* $P<0.05$ , \*\*/### $P<0.01$ , \*\*\*/#### $P<0.001$ , \*\*\*\*/##### $P<0.0001$ .

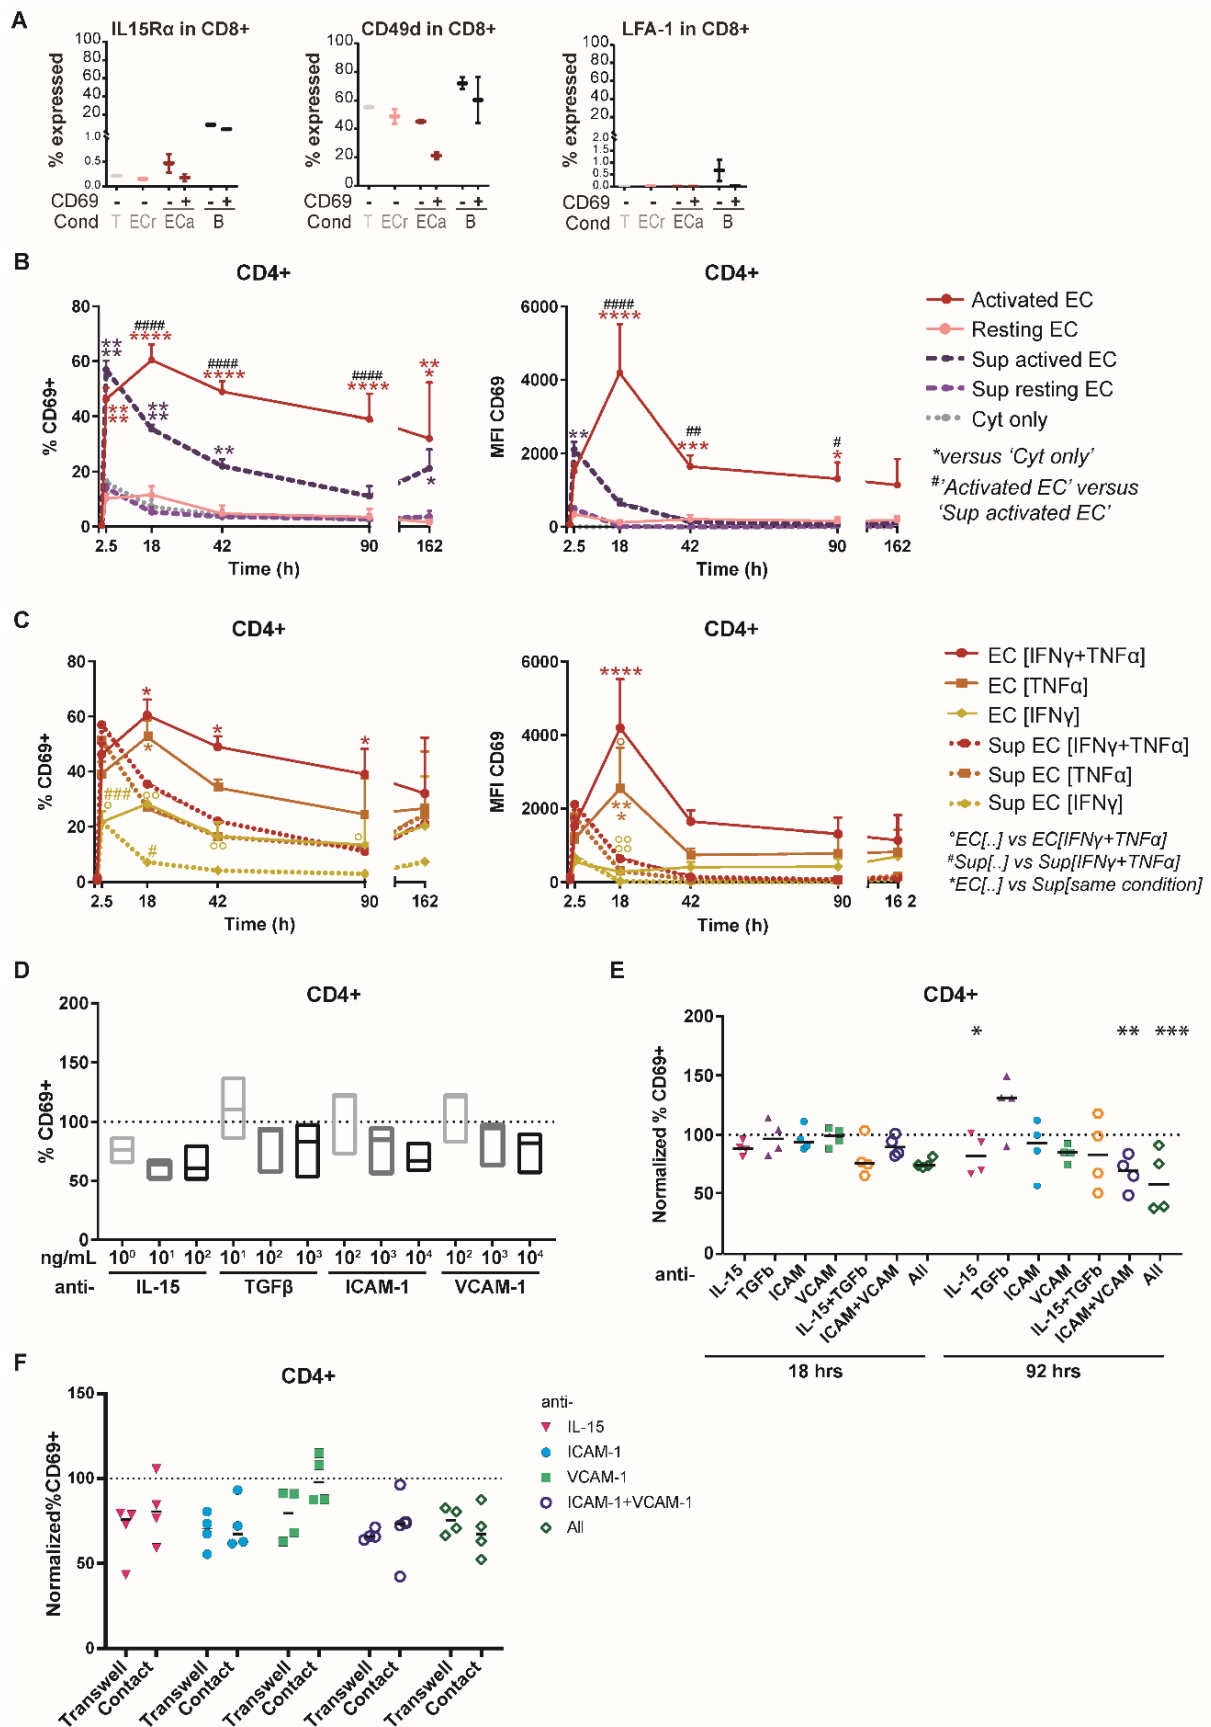

Supplementary figure 3. EC-induced CD69 expression on CD4<sup>+</sup> T cells is partly mediated by synergistic action of IL-15, ICAM-1 and VCAM-1.

**Supplementary figure 3 continued.** (A) Expression of IL-15R $\alpha$ , CD49d and LFA-1 on T cells co-cultured with resting or activated EC after 4 days, measured by flow cytometry. (B+C) EC were left unstimulated (resting) or stimulated with 10 ng/mL TNF $\alpha$  and/or IFN $\gamma$  for 3 days (activated) before addition of FACS-sorted CD3 $^+$  T cells to the co-culture or EC cultured medium. CD69 expression and proliferation were assessed at various time points of the co-culture. 2-Way-ANOVA with Sidak post-hoc test versus isotype. \* $^{\#}/^{\circ}P<0.05$ , \*\* $^{\#}/^{\circ}P<0.01$ , \*\*\* $^{\#}/^{\circ}P<0.001$ , \*\*\*\*  $^{\#}/^{\circ}P<0.0001$ . (B) Percentage of CD69 $^+$  cells (left panel) and median fluorescent intensity (MFI, right panel) of CD69 within CD8 $^+$  T cells after co-culture with TNF $\alpha$  and IFN $\gamma$ -stimulated EC, their cultured medium (sup=supernatant), or TNF $\alpha$  and IFN $\gamma$  alone.  $N=3$ , mean+SEM. (C) Percentage of CD69 $^+$  cells (left panel) and median fluorescent intensity (MFI, right panel) of CD69 within CD8 $^+$  T cells after co-culture with TNF $\alpha$ - and/or IFN $\gamma$ -stimulated EC or their cultured medium (sup).  $N=3$ , mean+SEM. (D+E) Co-culture of TNF $\alpha$  and IFN $\gamma$ -stimulated EC with FACS-sorted memory CD3 $^+$  T cells in the presence of increasing concentrations of monoclonal antibodies blocking IL-15, TGF- $\beta$ , ICAM-1 and/or VCAM. (D) The percentage of CD69 $^+$  cells was measured by flow cytometry after 18 hours and normalized to the percentage of CD69 $^+$  cells in the condition with isotype control (set to 100).  $N=3$ , median. Kruskal-Wallis with Dunn's post-hoc test versus isotype. (E) The percentage of CD69 $^+$  cells was measured by flow cytometry after 18 and 90 hours and normalized to the condition with isotype control (set to 100).  $N=4$ , median. 2-Way-ANOVA with Sidak post-hoc test versus isotype. \* $P<0.05$ , \*\* $P<0.01$ , \*\*\* $P<0.001$ .

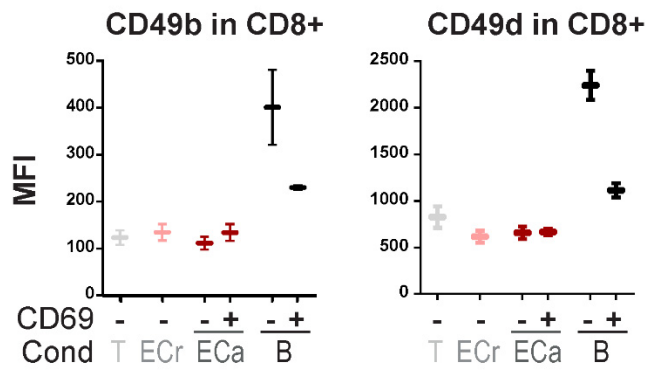

**Supplementary figure 4. Expression of integrins CD49b and CD49d in EC-stimulated CD8<sup>+</sup> T cells.** Co-culture of resting or TNF $\alpha$  and IFN $\gamma$ -stimulated HMEC or anti-CD3/CD28 beads with FACS-sorted memory CD3<sup>+</sup> T cells. Expression of integrins was assessed by flow cytometry after 7 days of co-culture.  $N=3$ , boxplots with median. Cond = condition, T = T cells only (CD69<sup>-</sup>), ECr = resting EC (CD69<sup>-</sup>), ECa = activated EC (CD69<sup>-</sup> and CD69<sup>+</sup>), B = anti-CD3/CD28 beads (CD69<sup>-</sup> and CD69<sup>+</sup>). Kruskal-Wallis with Dunn's post-hoc test.  $N=2$ .
